# Supplementary material for: Associations between Dynamic Vitamin D Level and Thyroid Function during Pregnancy
Source: MDPI journal article supplement (doi:10.3390/nu14183780), 2022-09-14
Supplement: s1 [file s1]

Table S1. Thyroid function in the quartile of VitD level <sup>1</sup> quartile in each trimester.

| Indicators                       | Q1 (2.4,13.1)             | Q2 (13.1,18.3) | Q3 (18.3,24.3) | Q4 (24.3,92.9) | P-value <sup>2</sup> |
|----------------------------------|---------------------------|----------------|----------------|----------------|----------------------|
| <b>First trimester(n=8828)</b>   | <b>n=2224</b>             | <b>n=2196</b>  | <b>n=2226</b>  | <b>n=2182</b>  |                      |
| VitD level                       | 10.30 (3.30) <sup>3</sup> | 15.80 (2.70)   | 21.30 (3.00)   | 28.30 (5.40)   | <0.001               |
| TPOAb(IU/mL)                     | 0.32 (0.57)               | 0.33 (0.57)    | 0.36 (0.61)    | 0.37 (0.70)    | 0.964                |
| TSH (μIU/ml)                     | 0.87 (0.97)               | 0.91 (0.97)    | 0.92 (0.93)    | 0.93 (0.93)    | 0.107                |
| fT3 (pmol/L)                     | 4.17 (0.64)               | 4.19 (0.60)    | 4.24 (0.62)    | 4.28 (0.64)    | <0.001               |
| fT4 (pmol/L)                     | 13.10 (2.09)              | 13.29 (2.09)   | 13.27 (1.97)   | 13.44 (2.06)   | 0.094                |
| <b>Second trimester (n=1396)</b> | <b>n=379</b>              | <b>n=327</b>   | <b>n=328</b>   | <b>n=362</b>   |                      |
| TSH (μIU/ml)                     | 0.91 (0.83)               | 0.85 (0.81)    | 0.84 (0.81)    | 0.84 (0.84)    | 0.585                |
| fT3 (pmol/L)                     | 4.08 (0.64)               | 4.08 (0.60)    | 4.10 (0.62)    | 4.04 (0.54)    | 0.437                |
| fT4 (pmol/L)                     | 11.21 (1.74)              | 11.22 (1.80)   | 11.12 (1.71)   | 11.29 (1.79)   | 0.226                |
| <b>Third trimester (n=562)</b>   | <b>n=129</b>              | <b>n=132</b>   | <b>n=160</b>   | <b>n=141</b>   |                      |
| TSH (μIU/ml)                     | 1.31 (1.14)               | 1.18 (1.03)    | 1.32 (1.19)    | 1.28 (1.16)    | 0.200                |
| fT3 (pmol/L)                     | 3.89 (0.63)               | 3.74 (0.63)    | 3.84 (0.62)    | 3.77 (0.59)    | 0.138                |
| fT4 (pmol/L)                     | 10.06 (1.89)              | 9.92 (1.67)    | 9.85 (1.97)    | 9.91 (1.58)    | 0.769                |

<sup>1</sup>The VitD level is based on the measurement of the first trimester.

<sup>2</sup> Continuous variables were compared by using One-way ANOVA test for normal distribution data or Kruskal-Wallis rank sum test for skew distribution data among the 4 subgroups.

<sup>3</sup>Values are present as median (IQR).

Table S2. Comparison of characteristics between the population of the total population and the GEE population

| Characteristic                                         | N = 8,616                 | N = 212       | P <sup>2</sup> |
|--------------------------------------------------------|---------------------------|---------------|----------------|
| Maternal age                                           | 29.40 (5.00) <sup>1</sup> | 29.60 (5.17)  | 0.477          |
| Maternal education                                     |                           |               | 0.014          |
| Low(high school or below)                              | 1,291 (15.0)              | 17 (8.0)      |                |
| Middle (college)                                       | 3,734 (43.3)              | 94 (44.3)     |                |
| High (university or above)                             | 3,591 (41.7)              | 101 (47.6)    |                |
| Maternal employment                                    |                           |               | 0.323          |
| Unemployed                                             | 952 (11.0)                | 28 (13.2)     |                |
| Employed                                               | 7,664 (89.0)              | 184 (86.8)    |                |
| Race/ethnicity                                         |                           |               | 0.897          |
| Han                                                    | 8,106 (94.1)              | 199 (93.9)    |                |
| Other                                                  | 510 (5.9)                 | 13 (6.1)      |                |
| Parity                                                 |                           |               | 0.171          |
| Primiparous                                            | 4,918 (57.1)              | 131 (61.8)    |                |
| Multiparous                                            | 3,698 (42.9)              | 81 (38.2)     |                |
| Maternal BMI class                                     |                           |               | 0.685          |
| Underweight                                            | 819 (9.5)                 | 21 (9.9)      |                |
| Normal                                                 | 5,677 (65.9)              | 146 (68.9)    |                |
| Overweight                                             | 1,679 (19.5)              | 37 (17.5)     |                |
| Obesity                                                | 441 (5.1)                 | 8 (3.8)       |                |
| Folate supplement 3-months before and after conception |                           |               | 0.121          |
| No                                                     | 748 (8.7)                 | 12 (5.7)      |                |
| Yes                                                    | 7,868 (91.3)              | 200 (94.3)    |                |
| Season of conception                                   |                           |               | 0.124          |
| Spring                                                 | 1,926 (22.4)              | 48 (22.6)     |                |
| Summer                                                 | 1,584 (18.4)              | 47 (22.2)     |                |
| Autumn                                                 | 2,545 (29.5)              | 69 (32.5)     |                |
| Winter                                                 | 2,561 (29.7)              | 48 (22.6)     |                |
| Vitamin D (0-13 weeks), ng/ml                          | 18.30 (11.10)             | 19.85 (11.55) | 0.089          |
| Vitamin D deficiency (0-13 weeks)                      |                           |               | 0.047          |
| No                                                     | 3,678 (42.7)              | 105 (49.5)    |                |
| Yes                                                    | 4,938 (57.3)              | 107 (50.5)    |                |
| Vitamin D (14-28 weeks), ng/ml                         | 30.50 (16.30)             | 30.80 (14.73) | 0.266          |
| Vitamin D deficiency (14-28 weeks)                     |                           |               | 0.037          |
| No                                                     | 6,899 (80.1)              | 182 (85.8)    |                |
| Yes                                                    | 1,717 (19.9)              | 30 (14.2)     |                |
| Vitamin D supplement during pregnancy                  |                           |               | 0.555          |
| No                                                     | 793 (9.2)                 | 17 (8.0)      |                |
| Yes                                                    | 7,823 (90.8)              | 195 (92.0)    |                |
| Multivitamin supplement during pregnancy               |                           |               | 0.125          |
| No                                                     | 4,198 (48.7)              | 92 (43.4)     |                |
| Yes                                                    | 4,418 (51.3)              | 120 (56.6)    |                |
| Gestational Hypertensive Disorder                      | 176 (2.0)                 | 9 (4.2)       | 0.045          |
| Gestational Diabetes Mellitus                          | 2,412 (28.0)              | 80 (37.7)     | 0.002          |
| <b>First trimester(n=8616)</b>                         |                           |               |                |
| TPOAb (IU/mL)                                          | 0.35 (0.60)               | 0.56 (62.64)  | <0.001         |
| TPOAb positive diagnosis                               |                           |               | <0.001         |
| No                                                     | 7,690 (89.3)              | 145 (68.4)    |                |
| Yes                                                    | 926 (10.7)                | 67 (31.6)     |                |

| Characteristic                  | N = 8,616    | N = 212      | <i>P</i> <sup>2</sup> |
|---------------------------------|--------------|--------------|-----------------------|
| TSH (μIU/ml)                    | 0.92 (0.94)  | 0.23 (0.95)  | <0.001                |
| fT3 (pmol/L)                    | 4.21 (0.62)  | 4.53 (1.01)  | <0.001                |
| fT4 (pmol/L)                    | 13.27 (2.04) | 14.34 (3.55) | <0.001                |
| <b>Second trimester(n=1184)</b> |              |              |                       |
| TSH (μIU/ml)                    | 0.87 (0.80)  | 0.83 (1.13)  | 0.157                 |
| fT3 (pmol/L)                    | 4.07 (0.61)  | 4.02 (0.65)  | 0.491                 |
| fT4 (pmol/L)                    | 11.22 (1.73) | 11.20 (2.13) | 0.659                 |
| <b>Third trimester (n=350)</b>  |              |              |                       |
| TSH (μIU/ml)                    | 1.42 (1.17)  | 1.04 (0.97)  | <0.001                |
| fT3 (pmol/L)                    | 3.80 (0.60)  | 3.88 (0.71)  | 0.093                 |
| fT4 (pmol/L)                    | 9.74 (1.66)  | 10.20 (1.70) | <0.001                |

<sup>1</sup>Values are n (%) for categorical variables and median (IQR) for a continuous variable with a skewed distribution. Vitamin D concentration was measured with 25-hydroxyvitamin D in the serum.

<sup>2</sup> Continuous variables were compared by using One-way ANOVA test for normal distribution data or Kruskal-Wallis rank sum test for skew distribution data among the 4 subgroups.

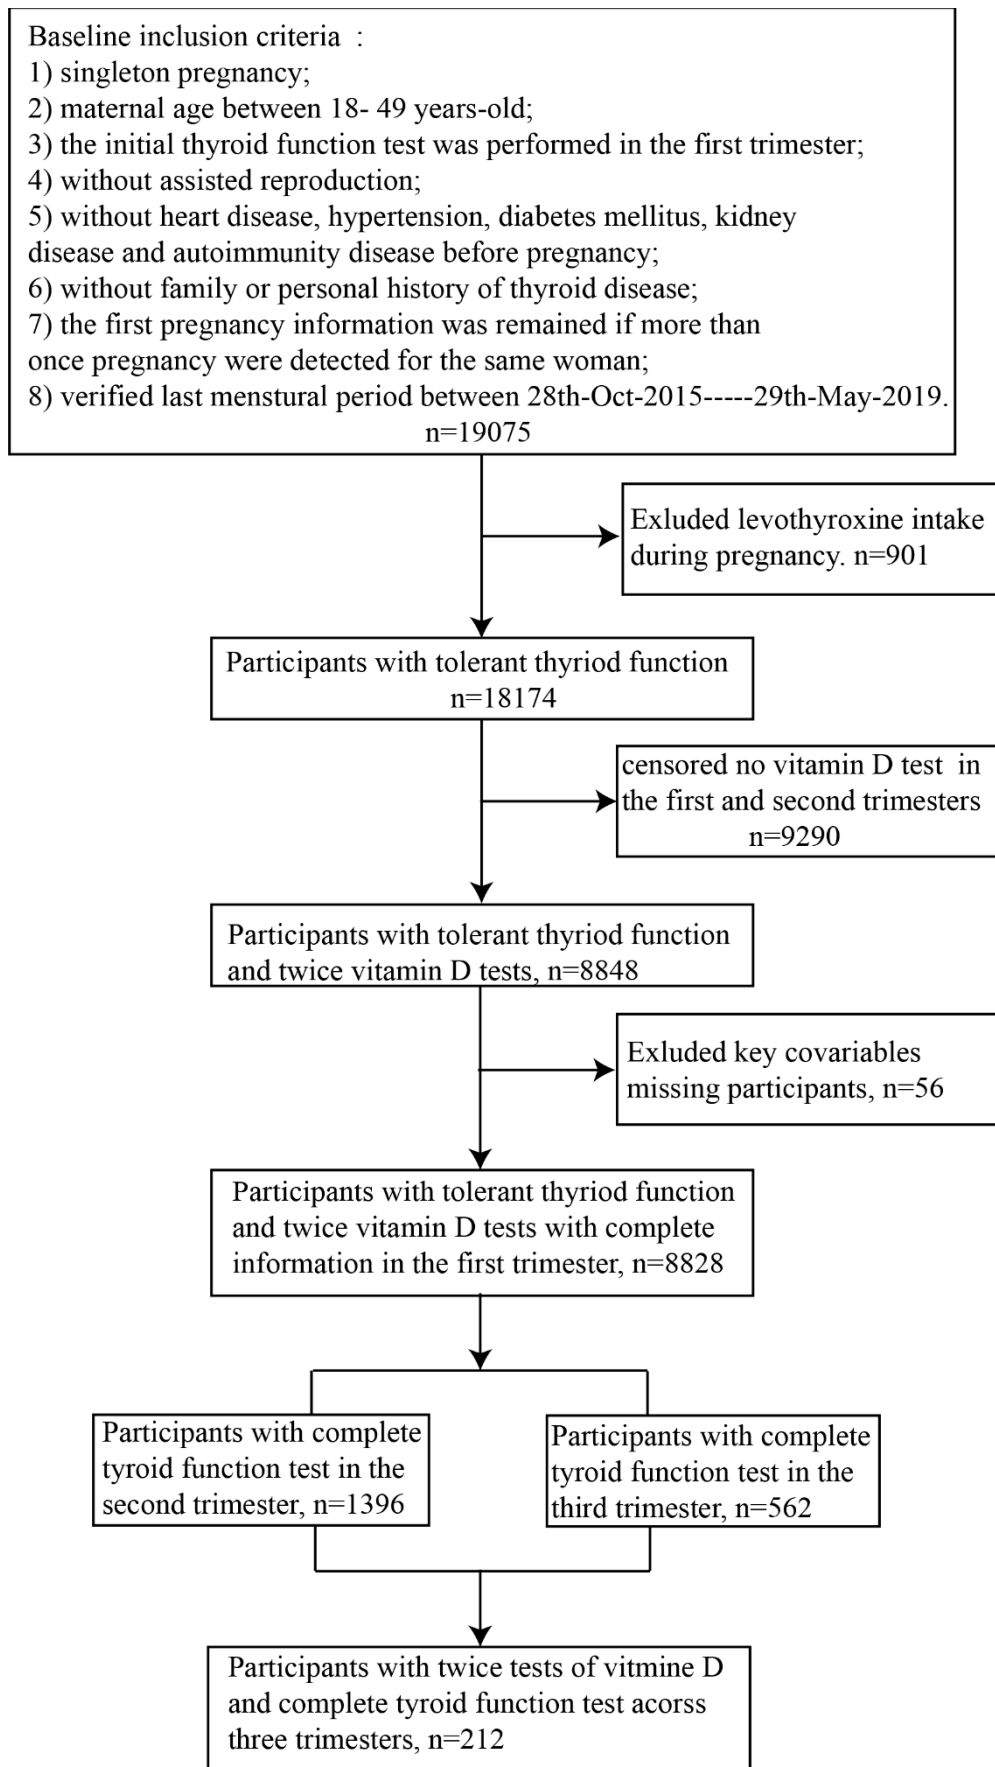

Figure S1. Flowchart of selection of participants.

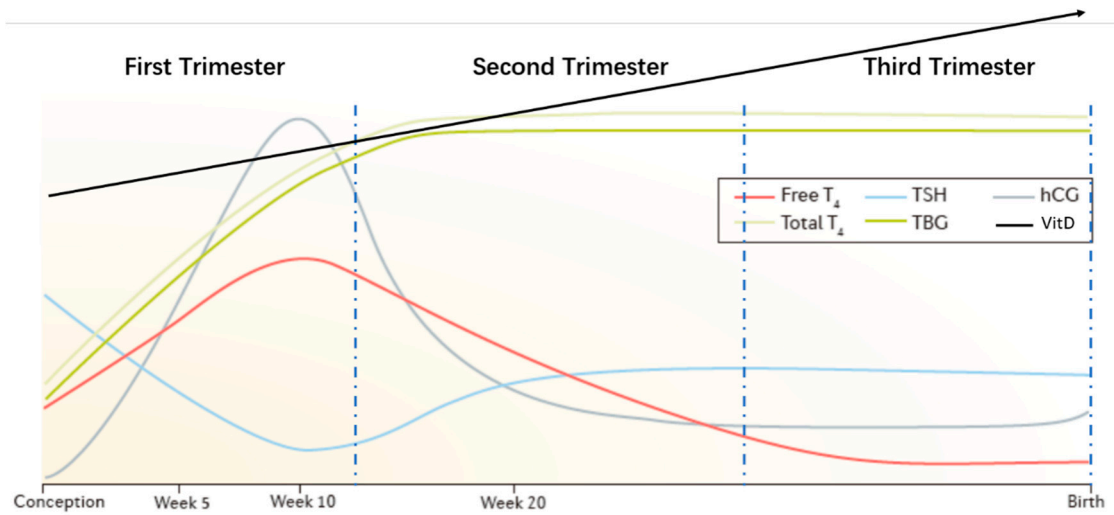

Figure S2. Schematic diagram of theoretically physiological changes of vitamin D and thyroid parameters. (Modified from thyroid disease in pregnancy: new insights in diagnosis and clinical management.)
